# Supplementary material
Source: ML conference proceedings conference paper supplement (https://openaccess.thecvf.com/content/CVPR_2019/html/Fan_Shifting_More_Attention_CVPR_2019_paper.html)
Supplement: Supplementary file 1 [file Fan_Shifting_More_Attention_CVPR_2019_supplemental.pdf]

Archive with 6 entries (5 files):
- 1853-supp/
- 1853-supp/1853-supp.pdf
- 1853-supp/select_0562.avi
- 1853-supp/select_0562Fixation.avi
- 1853-supp/select_0562Image.avi
- 1853-supp/select_0562ObjectLevel.avi
