# Supplementary material
Source: ML conference proceedings conference paper supplement (https://openaccess.thecvf.com/content/CVPR_2019/html/Fan_Shifting_More_Attention_CVPR_2019_paper.html)
Supplement: Supplementary file 1 [file Fan_Shifting_More_Attention_CVPR_2019_supplemental.pdf › 1853-supp/1853-supp.pdf]

# Shifting More Attention to Video Salient Object Detection

## Supplemental Material

Deng-Ping Fan<sup>1</sup>

Wenguan Wang<sup>2</sup>

Ming-Ming Cheng<sup>1</sup> \*

Jianbing Shen<sup>2,3</sup>

<sup>1</sup> TKLNDST, CS, Nankai University

<sup>2</sup> Inception Institute of Artificial Intelligence

<sup>3</sup> Beijing Institute of Technology

<http://dpfan.net/DAVSOD/>

### Abstract

In this document, we include additional materials related to the benchmark, dataset, model, evaluation metrics, and results.

- **Benchmark.** We systematically assess 17 representative VSOD algorithms [3, 4, 7, 9, 11–13, 17–19, 21–26, 28] over seven existing VSOD datasets and the proposed DAVSOD with totally about 84K frames, making it the largest-scale benchmark.
- **Dataset.** We show a complete statistics of existing datasets and provide some representative sample frames of the proposed DAVSOD dataset.
- **Model.** We describe our implementation details in § 3.
- **Metrics.** In § 4.1, we describe the details of three metrics, e.g., MAE ( $\mathcal{M}$ ) [15], F-measure ( $\mathcal{F}$ ) [1], and S-measure ( $\mathcal{S}$ ) [5] and the details of metric statistics in Table 4 (manuscript).
- **Results.** We provide more experiment results on existing 7 datasets [7, 8, 10, 12, 14, 16, 23] and the proposed dataset in § 4.3. The overall dataset will be publicly available on our [website](#).

All of the model results (17 state-of-the-art and the proposed SSAV model) on 8 datasets (7 existing datasets and the proposed DAVSOD dataset) will be released in our website to boost the development of video salient detection.

## 1. Benchmark

As shown in Fig. 1, it has witnessed the dramatic development of VSOD modeling, while the community long-term suffered from the lack of a standard representative benchmark. To the best of our knowledge, this work is first one largest-scale VSOD benchmark.

\*M.M. Cheng (cmm@nankai.edu.cn) is the corresponding author.

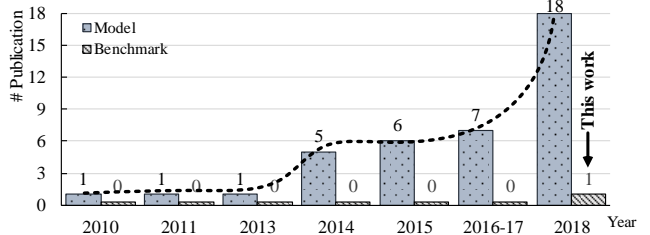

Figure 1: Number of VSOD papers on top conferences (i.e., CVPR, ICCV, ECCV) and IEEE Trans. journals over the past 9 years.

## 2. Dataset

A complete statistics of previous VSOD dataset and the proposed DAVSOD dataset in Section 3 (manuscript) can be found in Table 1.

In our dataset, the salient objects may be changed at different time (see Fig. 2), which is more realistic and requires a complete video content understanding.

As described in Section 3.2 (manuscript), the annotators were pre-trained with ten video examples. We also conducted an explicit verification step on each segmented instance to guarantee good quality. Some high-quality annotated examples can be found in Fig. 3. In Fig. 4 and Fig. 5, we visualize a representative frame of each sequence with instance level ground-truth masks and fixation map overlaid in different color. Examples of cases that either passed or were rejected are shown in Fig. 6.

## 3. Model

### 3.1. Implementation Details

The base CNN network of PDC model is borrowed from the conv blocks from ResNet-50 [6] and the conv strides of the last two blocks are changed to 1. All the input frame images are resized into  $473 \times 473$  spatial resolution, and  $\mathbf{Q} \in \mathbb{R}^{60 \times 60 \times 2048}$ . Following [18], we set  $K = 4$ ,  $C = 512$  and  $d_k = 2^k$  ( $k \in \{1, \dots, 4\}$ ). For the convLSTM in Eq. 2 (manuscript), we use a  $3 \times 3 \times 32$  conv kernel. The convLSTM<sup>A</sup> in Eq. 3 (manuscript) utilizes a  $3 \times 3 \times 16$  conv kernel.

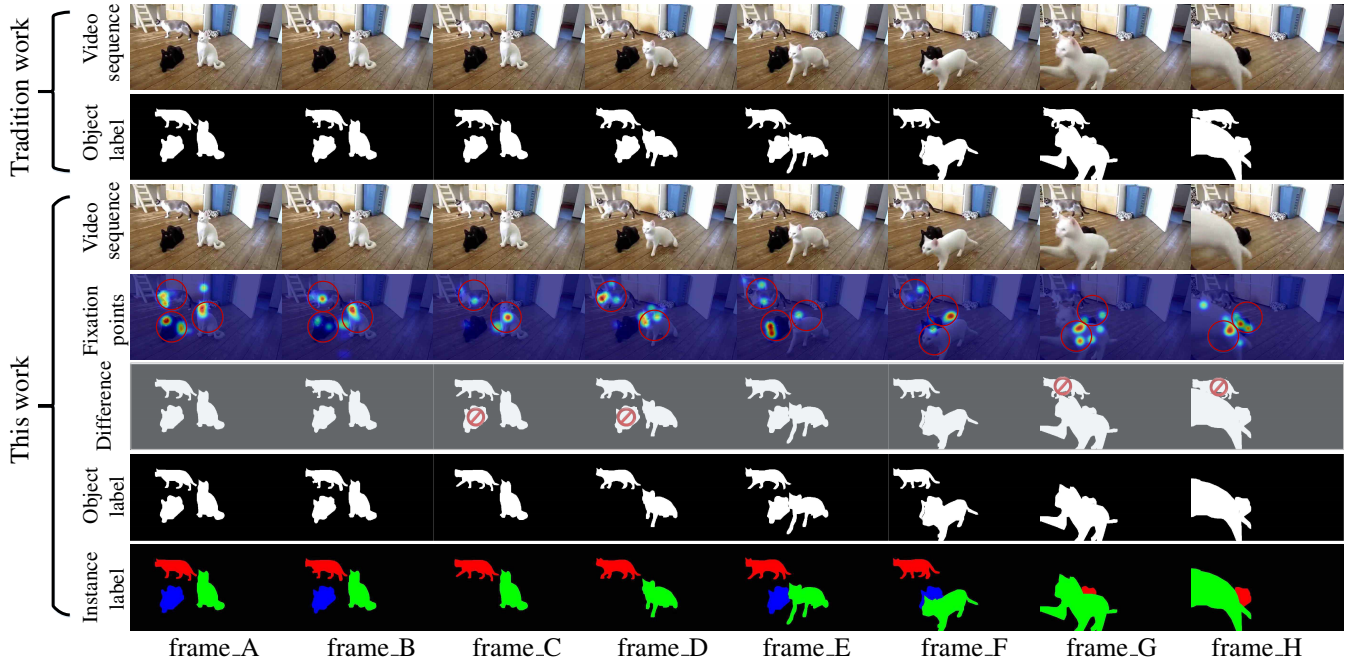

Figure 2: **Example sequence of saliency shift considered in the proposed DAVSOD dataset.** Different ( $5^{th}$  row) from tradition work which only labels all of the salient object ( $2^{th}$  row) via *static* frames, without a *dynamic* human eye-fixation guided annotation methodology. The proposed DAVSOD dataset were strictly annotated according to real human fixation record ( $4^{rd}$  row), thus reveal real human attention mechanism during dynamic viewing. Zoom-in for details.

| Dataset       | Year | Pub   | #Vi.       | #AF.          | HQ | SIZE | AS | FP | EF | IL | DE | AN | DL |
|---------------|------|-------|------------|---------------|----|------|----|----|----|----|----|----|----|
| SegV1 [20]    | 2010 | BMVC  | 6          | 244           |    |      |    |    |    |    |    | ✓  | ✓  |
| SegV2 [8]     | 2013 | ICCV  | 14         | 1,065         |    |      |    |    |    |    |    | ✓  | ✓  |
| FBMS [14]     | 2014 | TPAMI | 59         | 720           | ✓  |      |    |    |    |    |    |    |    |
| ViSal [23]    | 2015 | TIP   | 17         | 193           |    |      |    |    |    |    |    |    |    |
| MCL [7]       | 2015 | TIP   | 9          | 463           |    |      |    |    |    |    |    | ✓  |    |
| DAVIS [16]    | 2016 | CVPR  | 50         | 3,455         | ✓  |      |    |    |    |    |    | ✓  | ✓  |
| UVSD [12]     | 2017 | TCSVT | 18         | 3,262         | ✓  |      |    |    |    |    |    |    | ✓  |
| VOS [10]      | 2018 | TIP   | 200        | 7,467         |    | ✓    |    | ✓  |    |    |    |    |    |
| <b>DAVSOD</b> | 2019 | CVPR  | <b>226</b> | <b>23,938</b> | ✓  | ✓    | ✓  | ✓  | ✓  | ✓  | ✓  | ✓  | ✓  |

Table 1: **Statistics of previous VSOD datasets and the proposed DAVSOD dataset.** From left to right: number of videos (#Vi.), number of annotated frames (#AF.), high quality annotation for dataset (HQ), large ( $\geq 100$  videos) size of the dataset (SIZE), whether consider attention shift (AS) phenomena, whether annotate salient objects according to human fixation points (FP), whether offer the eye fixation points of annotated salient objects (EF), whether provide instance-level annotation (IL), whether provide video description (DE), whether provide attribute annotation (AN), densely (per-frame) labeling (DL). Our dataset is the only one meeting all requirements. SegV1, and SegV2 originally introduced to evaluate tracking algorithms and then widely used for video segmentation and VSOD. SegV1 is a subset of SegV2. For the video clip of *penguins* in SegV2, only several penguins in the center are annotated as salient objects in the original ground truths, thus Liu *et al.* [12] relabeled this sequence to generate the higher quality annotations.

## 4. Metrics

### 4.1. Evaluation Metrics

**MAE  $\mathcal{M}$ .** We follow Perazzi *et al.* [15] to evaluate the *mean absolute error* (MAE) between a real-valued saliency map  $S$  and a binary ground-truth  $G$  for all image pixels:

$$\text{MAE} = \frac{1}{N} |S - G|, \quad (1)$$

where  $N$  is the total number of pixels. The MAE estimates the approximation degree between the saliency map and the ground-truth map, and it is normalized to  $[0, 1]$ . The MAE provides a direct estimate of conformity between estimated and ground-truth maps. However, for the MAE metric, small objects naturally assign a smaller error and larger objects have larger errors. The metric also can not tell where the error occurs [20].

**F-measure  $\mathcal{F}$ .** F-measure is essentially a region based similarity metric. Following Cheng and Zhang *et al.* works [2, 27], we also provide the max F-measure using varying fixed (0-255) thresholds, and F-measure using adaptive ([1]) threshold.

**S-measure  $\mathcal{S}$ .** Both MAE and F-measure metrics ignore the important structure information evaluation, whereas behavioral vision studies have shown that the human visual system is highly sensitive to structures in scenes [5]. Thus, we additionally include the structure metric S-measure [5] for a more comprehensive evaluation. The S-measure combines the region-aware ( $\mathcal{S}_r$ ) and object-aware ( $\mathcal{S}_o$ ) structural similarity as their final structure metric:

$$\mathcal{S} = \alpha * \mathcal{S}_o + (1 - \alpha) * \mathcal{S}_r, \quad (2)$$

where  $\alpha \in [0, 1]$  is the balance parameter and set 0.5 as default.

## 4.2. Metric Statistics

For a given metric  $\vartheta \in \{\mathcal{S}_\alpha, F_\beta, mae, \zeta\}$  we consider different statistics. Let  $V = \{S_i\}$  be the dataset of video sequence  $S_i$ .  $I_j^i$  denote the image of video sequence. Thus,  $S_i = \{I_1^i, I_2^i, \dots, I_j^i\}$ . Let  $\bar{\vartheta}(S_i)$  be the metric average on  $S_i$ . The *mean* is the average dataset statistic defined as  $M_\vartheta(R) = \frac{1}{|R|} \sum_{S \in R} \bar{\vartheta}(S_i)$ . Specifically,  $\zeta_{dif}(R) = \frac{1}{|R|} \sum_{S \in R} |\bar{\zeta}_{gt}(S_i) - \bar{\zeta}_{sal}(S_i)|$ . The average difference of metric over different datasets are summarized in Table 2.

## 4.3. More Experiment Results

In manuscript, we have shown that the proposed SSAV algorithm captures the saliency-shift phenomenon successfully. Here, we present more experiment results regarding to various of challenging scenes.

Given an input video sequence, the proposed SSAV model generates high-quality detection results of the salient object. Our model is capable of handling unconstrained videos that span a wide variety of situations including object with slow motion (bird in Fig. 7), occlusion (rabbit in Fig. 8), clutter (car in Fig. 9), shadow (ball in Fig. 10), simple background (cup in Fig. 11), non-ridge deformation (moving worm in Fig. 12), dynamic background (dancer in Fig. 13), and low contrast (train in Fig. 14).

## References

- [1] R. Achanta, S. Hemami, F. Estrada, and S. Susstrunk. Frequency-tuned salient region detection. In *IEEE CVPR*, pages 1597–1604, 2009. 1, 3
- [2] A. Borji, M.-M. Cheng, H. Jiang, and J. Li. Salient Object Detection: A Benchmark. *IEEE TIP*, 24(12):5706–5722, 2015. 3
- [3] C. Chen, S. Li, Y. Wang, H. Qin, and A. Hao. Video saliency detection via spatial-temporal fusion and low-rank coherency diffusion. *IEEE TIP*, 26(7):3156–3170, 2017. 1, 4, 9, 10, 11, 12
- [4] Y. Chen, W. Zou, Y. Tang, X. Li, C. Xu, and N. Komodakis. Scom: Spatiotemporal constrained optimization for salient object detection. *IEEE TIP*, 27(7):3345–3357, 2018. 1, 4, 9, 10, 12
- [5] D.-P. Fan, M.-M. Cheng, Y. Liu, T. Li, and A. Borji. Structure-measure: A New Way to Evaluate Foreground Maps. In *IEEE ICCV*, pages 4548–4557, 2017. 1, 3
- [6] K. He, X. Zhang, S. Ren, and J. Sun. Deep residual learning for image recognition. In *IEEE CVPR*, pages 770–778, 2016. 1
- [7] H. Kim, Y. Kim, J.-Y. Sim, and C.-S. Kim. Spatiotemporal saliency detection for video sequences based on random walk with restart. *IEEE TIP*, 24(8):2552–2564, 2015. 1, 2, 4, 6, 9, 10, 11, 12
- [8] F. Li, T. Kim, A. Humayun, D. Tsai, and J. M. Rehg. Video segmentation by tracking many figure-ground segments. In *IEEE ICCV*, pages 2192–2199, 2013. 1, 2, 4, 6, 12
- [9] G. Li, Y. Xie, T. Wei, K. Wang, and L. Lin. Flow guided recurrent neural encoder for video salient object detection. In *IEEE CVPR*, pages 3243–3252, 2018. 1, 4, 9, 10, 11, 12
- [10] J. Li, C. Xia, and X. Chen. A benchmark dataset and saliency-guided stacked autoencoders for video-based salient object detection. *IEEE TIP*, 27(1):349–364, 2018. 1, 2, 4, 6, 11
- [11] S. Li, B. Seybold, A. Vorobyov, X. Lei, and C.-C. Jay Kuo. Unsupervised video object segmentation with motion-based bilateral networks. In *ECCV*. Springer, 2018. 1, 4, 9, 10, 11, 12
- [12] Z. Liu, J. Li, L. Ye, G. Sun, and L. Shen. Saliency detection for unconstrained videos using superpixel-level graph and spatiotemporal propagation. *IEEE TCSVT*, 27(12):2527–2542, 2017. 1, 2, 4, 9, 10, 11, 12
- [13] Z. Liu, X. Zhang, S. Luo, and O. Le Meur. Superpixel-based spatiotemporal saliency detection. *IEEE TCSVT*, 24(9):1522–1540, 2014. 1, 4, 9, 10, 11, 12
- [14] P. Ochs, J. Malik, and T. Brox. Segmentation of moving objects by long term video analysis. *IEEE TPAMI*, 36(6):1187–1200, 2014. 1, 2, 4, 10
- [15] F. Perazzi, P. Krähenbühl, Y. Pritch, and A. Hornung. Saliency filters: Contrast based filtering for salient region detection. In *CVPR*, pages 733–740, 2012. 1, 2
- [16] F. Perazzi, J. Pont-Tuset, B. McWilliams, L. Van Gool, M. Gross, and A. Sorkine-Hornung. A benchmark dataset and evaluation methodology for video object segmentation. In *IEEE CVPR*, pages 724–732, 2016. 1, 2, 4, 10
- [17] E. Rahtu, J. Kannala, M. Salo, and J. Heikkilä. Segmenting salient objects from images and videos. In *ECCV*, pages 366–379. Springer, 2010. 1, 4, 9, 10, 11, 12
- [18] H. Song, W. Wang, S. Zhao, J. Sheng, and K.-M. Lam. Pyramid dilated deeper convLSTM for video salient object detection. In *ECCV*. Springer, 2018. 1, 4, 9, 10, 11, 12
- [19] Y. Tang, W. Zou, Z. Jin, Y. Chen, Y. Hua, and X. Li. Weakly supervised salient object detection with spatiotemporal cas-

|                 | Metric                       | 2010-2015    |              |              |             |            |              |              | 2016-2017    |              |              |             | 2018                     |                           |                           |                          |                           |                           |       | SSAV <sup>†</sup> |
|-----------------|------------------------------|--------------|--------------|--------------|-------------|------------|--------------|--------------|--------------|--------------|--------------|-------------|--------------------------|---------------------------|---------------------------|--------------------------|---------------------------|---------------------------|-------|-------------------|
|                 |                              | SIVM<br>[17] | TIMP<br>[28] | SPVM<br>[13] | RWRV<br>[7] | MB<br>[26] | SAGM<br>[22] | GFVM<br>[23] | MSTM<br>[21] | STBP<br>[25] | SGSP<br>[12] | SFLR<br>[3] | SCOM<br>[4] <sup>†</sup> | SCNN<br>[19] <sup>†</sup> | DLVS<br>[24] <sup>†</sup> | FGRN<br>[9] <sup>†</sup> | MBNM<br>[11] <sup>†</sup> | PDBM<br>[18] <sup>†</sup> |       |                   |
| ViSal           | max $\mathcal{F}$ $\uparrow$ | .522         | .479         | .700         | .440        | .692       | .688         | .683         | .673         | .622         | .677         | .779        | .831                     | .831                      | .852                      | .848                     | .883                      | .888                      | .939  |                   |
|                 | ranking                      | 16           | 17           | 9            | 18          | 10         | 11           | 12           | 14           | 15           | 13           | 8           | 6                        | 6                         | 4                         | 5                        | 3                         | 2                         | 1     |                   |
|                 | $\mathcal{S}$ $\uparrow$     | .606         | .612         | .724         | .595        | .726       | .749         | .757         | .749         | .629         | .706         | .814        | .762                     | .847                      | .881                      | .861                     | .898                      | .907                      | .943  |                   |
|                 | ranking                      | 17           | 16           | 13           | 18          | 12         | 10           | 9            | 10           | 15           | 14           | 7           | 8                        | 6                         | 4                         | 5                        | 3                         | 2                         | 1     |                   |
|                 | $\mathcal{M}$ $\downarrow$   | .197         | .170         | .133         | .188        | .129       | .105         | .107         | .095         | .163         | .165         | .062        | .122                     | .071                      | .048                      | .045                     | .020                      | .032                      | .020  |                   |
| ranking         | 18                           | 16           | 13           | 17           | 12          | 9          | 10           | 8            | 14           | 15           | 6            | 11          | 7                        | 5                         | 4                         | 1                        | 3                         | 1                         |       |                   |
| FBMS-T          | max $\mathcal{F}$ $\uparrow$ | .426         | .456         | .330         | .336        | .487       | .564         | .571         | .500         | .595         | .630         | .660        | .797                     | .762                      | .759                      | .767                     | .816                      | .821                      | .865  |                   |
|                 | ranking                      | 16           | 15           | 18           | 17          | 14         | 12           | 11           | 13           | 10           | 9            | 8           | 4                        | 6                         | 7                         | 5                        | 3                         | 2                         | 1     |                   |
|                 | $\mathcal{S}$ $\uparrow$     | .545         | .576         | .515         | .521        | .609       | .659         | .651         | .613         | .627         | .661         | .699        | .794                     | .794                      | .794                      | .809                     | .857                      | .851                      | .879  |                   |
|                 | ranking                      | 16           | 15           | 18           | 17          | 14         | 10           | 11           | 13           | 12           | 9            | 8           | 5                        | 5                         | 5                         | 4                        | 2                         | 3                         | 1     |                   |
|                 | $\mathcal{M}$ $\downarrow$   | .236         | .192         | .209         | .242        | .206       | .161         | .160         | .177         | .152         | .172         | .117        | .079                     | .095                      | .091                      | .088                     | .047                      | .064                      | .040  |                   |
| ranking         | 17                           | 14           | 16           | 18           | 15          | 11         | 10           | 13           | 9            | 12           | 8            | 4           | 7                        | 6                         | 5                         | 2                        | 3                         | 1                         |       |                   |
| DAVIS-T         | max $\mathcal{F}$ $\uparrow$ | .450         | .488         | .390         | .345        | .470       | .515         | .569         | .429         | .544         | .655         | .727        | .783                     | .714                      | .708                      | .783                     | .861                      | .855                      | .861  |                   |
|                 | ranking                      | 15           | 13           | 17           | 18          | 14         | 12           | 10           | 16           | 11           | 7            | 6           | 4                        | 7                         | 8                         | 4                        | 1                         | 3                         | 1     |                   |
|                 | $\mathcal{S}$ $\uparrow$     | .557         | .593         | .592         | .556        | .597       | .676         | .687         | .583         | .677         | .692         | .790        | .832                     | .783                      | .794                      | .838                     | .887                      | .882                      | .893  |                   |
|                 | ranking                      | 17           | 14           | 15           | 18          | 13         | 12           | 10           | 16           | 11           | 9            | 7           | 5                        | 8                         | 6                         | 4                        | 2                         | 3                         | 1     |                   |
|                 | $\mathcal{M}$ $\downarrow$   | .212         | .172         | .146         | .199        | .177       | .103         | .103         | .165         | .096         | .138         | .056        | .048                     | .064                      | .061                      | .043                     | .031                      | .028                      | .028  |                   |
| ranking         | 18                           | 15           | 13           | 17           | 16          | 10         | 10           | 14           | 9            | 12           | 6            | 5           | 8                        | 7                         | 4                         | 3                        | 2                         | 1                         |       |                   |
| SegV2           | max $\mathcal{F}$ $\uparrow$ | .581         | .573         | .618         | .438        | .554       | .634         | .592         | .526         | .640         | .673         | .745        | .764                     | **                        | **                        | **                       | .716                      | .800                      | .801  |                   |
|                 | ranking                      | 11           | 12           | 9            | 15          | 13         | 8            | 10           | 14           | 7            | 6            | 4           | 3                        |                           |                           |                          | 5                         | 2                         | 1     |                   |
|                 | $\mathcal{S}$ $\uparrow$     | .605         | .644         | .668         | .583        | .618       | .719         | .699         | .643         | .735         | .681         | .804        | .815                     | **                        | **                        | **                       | .809                      | .864                      | .851  |                   |
|                 | ranking                      | 14           | 11           | 10           | 15          | 13         | 7            | 8            | 12           | 6            | 9            | 5           | 3                        |                           |                           |                          | 4                         | 1                         | 2     |                   |
|                 | $\mathcal{M}$ $\downarrow$   | .251         | .116         | .108         | .162        | .146       | .081         | .091         | .114         | .061         | .124         | .037        | .030                     | **                        | **                        | **                       | .026                      | .024                      | .023  |                   |
| ranking         | 15                           | 11           | 9            | 14           | 13          | 7          | 8            | 10           | 6            | 12           | 5            | 4           |                          |                           |                           | 3                        | 2                         | 1                         |       |                   |
| UVSD            | max $\mathcal{F}$ $\uparrow$ | .293         | .338         | .404         | .281        | .339       | .414         | .426         | .336         | .403         | .544         | .562        | .420                     | .550                      | .564                      | .630                     | .550                      | .863                      | .801  |                   |
|                 | ranking                      | 17           | 15           | 12           | 18          | 14         | 11           | 9            | 16           | 13           | 8            | 5           | 10                       | 6                         | 4                         | 3                        | 6                         | 1                         | 2     |                   |
|                 | $\mathcal{S}$ $\uparrow$     | .481         | .537         | .581         | .536        | .563       | .629         | .628         | .551         | .614         | .601         | .713        | .555                     | .712                      | .721                      | .745                     | .698                      | .901                      | .861  |                   |
|                 | ranking                      | 18           | 16           | 12           | 17          | 13         | 8            | 9            | 15           | 10           | 11           | 5           | 14                       | 6                         | 4                         | 3                        | 7                         | 1                         | 2     |                   |
|                 | $\mathcal{M}$ $\downarrow$   | .260         | .178         | .146         | .180        | .169       | .111         | .106         | .145         | .105         | .165         | .059        | .206                     | .075                      | .060                      | .042                     | .079                      | .018                      | .025  |                   |
| ranking         | 18                           | 15           | 12           | 16           | 14          | 10         | 9            | 11           | 8            | 13           | 4            | 17          | 6                        | 5                         | 3                         | 7                        | 1                         | 2                         |       |                   |
| MCL             | max $\mathcal{F}$ $\uparrow$ | .420         | .598         | .595         | .446        | .261       | .422         | .406         | .313         | .607         | .645         | .669        | .422                     | .628                      | .551                      | .625                     | .698                      | .798                      | .774  |                   |
|                 | ranking                      | 15           | 9            | 10           | 12          | 18         | 13           | 16           | 17           | 8            | 5            | 4           | 13                       | 6                         | 11                        | 7                        | 3                         | 1                         | 2     |                   |
|                 | $\mathcal{S}$ $\uparrow$     | .548         | .642         | .665         | .577        | .539       | .615         | .613         | .540         | .700         | .679         | .734        | .569                     | .730                      | .682                      | .709                     | .755                      | .856                      | .819  |                   |
|                 | ranking                      | 16           | 11           | 10           | 14          | 18         | 12           | 13           | 17           | 7            | 9            | 4           | 15                       | 5                         | 8                         | 6                        | 3                         | 1                         | 2     |                   |
|                 | $\mathcal{M}$ $\downarrow$   | .185         | .113         | .105         | .167        | .178       | .136         | .132         | .171         | .078         | .100         | .054        | .204                     | .054                      | .060                      | .044                     | .119                      | .021                      | .027  |                   |
| ranking         | 17                           | 10           | 9            | 14           | 16          | 13         | 12           | 15           | 7            | 8            | 4            | 18          | 4                        | 6                         | 3                         | 11                       | 1                         | 2                         |       |                   |
| VOS-T           | max $\mathcal{F}$ $\uparrow$ | .439         | .401         | .351         | .422        | .562       | .482         | .506         | .567         | .526         | .426         | .546        | .690                     | .609                      | .675                      | .669                     | .670                      | .742                      | .742  |                   |
|                 | ranking                      | 14           | 17           | 18           | 16          | 9          | 13           | 12           | 8            | 11           | 15           | 10          | 3                        | 7                         | 4                         | 6                        | 5                         | 1                         | 1     |                   |
|                 | $\mathcal{S}$ $\uparrow$     | .558         | .575         | .511         | .552        | .661       | .619         | .615         | .657         | .576         | .557         | .624        | .712                     | .704                      | .760                      | .715                     | .742                      | .818                      | .819  |                   |
|                 | ranking                      | 15           | 14           | 18           | 17          | 8          | 11           | 12           | 9            | 13           | 16           | 10          | 6                        | 7                         | 3                         | 5                        | 4                         | 2                         | 1     |                   |
|                 | $\mathcal{M}$ $\downarrow$   | .217         | .215         | .223         | .211        | .158       | .172         | .162         | .144         | .163         | .236         | .145        | .162                     | .109                      | .099                      | .097                     | .099                      | .078                      | .073  |                   |
| ranking         | 16                           | 15           | 17           | 14           | 9           | 13         | 10           | 7            | 12           | 18           | 8            | 10          | 6                        | 4                         | 3                         | 4                        | 2                         | 1                         |       |                   |
| DAVSOD-T        | max $\mathcal{F}$ $\uparrow$ | .298         | .395         | .358         | .283        | .342       | .370         | .334         | .344         | .410         | .426         | .478        | .464                     | .532                      | .521                      | .573                     | .520                      | .572                      | .603  |                   |
|                 | ranking                      | 17           | 11           | 13           | 18          | 15         | 12           | 16           | 14           | 10           | 9            | 7           | 8                        | 4                         | 5                         | 2                        | 6                         | 3                         | 1     |                   |
|                 | $\mathcal{S}$ $\uparrow$     | .486         | .563         | .538         | .504        | .538       | .565         | .553         | .532         | .568         | .577         | .624        | .599                     | .674                      | .657                      | .693                     | .637                      | .698                      | .724  |                   |
|                 | ranking                      | 18           | 12           | 14           | 17          | 14         | 11           | 13           | 16           | 10           | 9            | 7           | 8                        | 4                         | 5                         | 3                        | 6                         | 2                         | 1     |                   |
|                 | $\mathcal{M}$ $\downarrow$   | .288         | .195         | .202         | .245        | .228       | .184         | .167         | .211         | .160         | .207         | .143        | .220                     | .128                      | .129                      | .098                     | .159                      | .116                      | .092  |                   |
| ranking         | 18                           | 11           | 12           | 17           | 16          | 10         | 8            | 14           | 7            | 13           | 6            | 15          | 4                        | 5                         | 2                         | 9                        | 3                         | 1                         |       |                   |
| overall ranking |                              | 18           | 16           | 14           | 17          | 15         | 10           | 11           | 13           | 9            | 12           | 7           | 8                        | 6                         | 5                         | 3                        | 4                         | 2                         | 1     |                   |
| Run time        |                              | 72.4s        | 69.2s        | 56.1s        | 18.3s       | 0.02s      | 45.4s        | 53.7s        | 0.02s        | 49.49s       | 51.7s        | 119.4s      | 38.8s                    | 38.5s                     | 0.47s                     | 0.09s                    | 2.63s                     | 0.05s                     | 0.05s |                   |
| ranking         |                              | 17           | 16           | 15           | 8           | 1          | 11           | 14           | 1            | 12           | 13           | 18          | 10                       | 9                         | 6                         | 5                        | 7                         | 3                         | 3     |                   |

Table 2: **Benchmarking results of 17 state-of-the-art VSOD models on 7 datasets:** *SegV2* [8], *FBMS* [14], *ViSal* [23], *DAVIS* [16], *UVSD* [12], *VOS* [10] and the proposed *DAVSOD*. Note that *TIMP* was only tested on 9 short sequences of *VOS* because it cannot handle long videos. “\*\*” indicates the model has been trained on this dataset. “-T” indicates the results on the test set of this dataset. “†” indicates deep learning model. “score” indicates the GPU time. The top three models are marked in red, blue, and green color, respectively.

- cade neural networks. *IEEE TCSVT*, 2018. 1, 4, 9, 10, 11, 12
- [20] D. Tsai, M. Flagg, and J. Rehg. Motion coherent tracking with multi-label mrf optimization, algorithms. In *BMVC*, 2010. 2, 6
  - [21] W.-C. Tu, S. He, Q. Yang, and S.-Y. Chien. Real-time salient object detection with a minimum spanning tree. In *IEEE CVPR*, pages 2334–2342, 2016. 1, 4, 9, 10, 11, 12
  - [22] W. Wang, J. Shen, and F. Porikli. Saliency-aware geodesic video object segmentation. In *IEEE CVPR*, pages 3395–3402, 2015. 1, 4, 9, 10, 11, 12
  - [23] W. Wang, J. Shen, and L. Shao. Consistent video saliency using local gradient flow optimization and global refinement. *IEEE TIP*, 24(11):4185–4196, 2015. 1, 2, 4, 6, 9, 10, 11, 12
  - [24] W. Wang, J. Shen, and L. Shao. Video salient object detection via fully convolutional networks. *IEEE TIP*, 27(1):38–49, 2018. 1, 4, 9, 10, 11, 12
  - [25] T. Xi, W. Zhao, H. Wang, and W. Lin. Salient object detection with spatiotemporal background priors for video. *IEEE TIP*, 26(7):3425–3436, 2017. 1, 4, 9, 10, 11, 12
  - [26] J. Zhang, S. Sclaroff, Z. Lin, X. Shen, B. Price, and R. Mech. Minimum barrier salient object detection at 80 fps. In *IEEE ICCV*, pages 1404–1412, 2015. 1, 4, 9, 10, 11, 12
  - [27] P. Zhang, D. Wang, H. Lu, H. Wang, and X. Ruan. Amulet: Aggregating multi-level convolutional features for salient object detection. In *IEEE ICCV*, pages 202–211, 2017. 3
  - [28] F. Zhou, S. Bing Kang, and M. F. Cohen. Time-mapping using space-time saliency. In *IEEE CVPR*, pages 3358–3365, 2014. 1, 4, 9, 10, 12

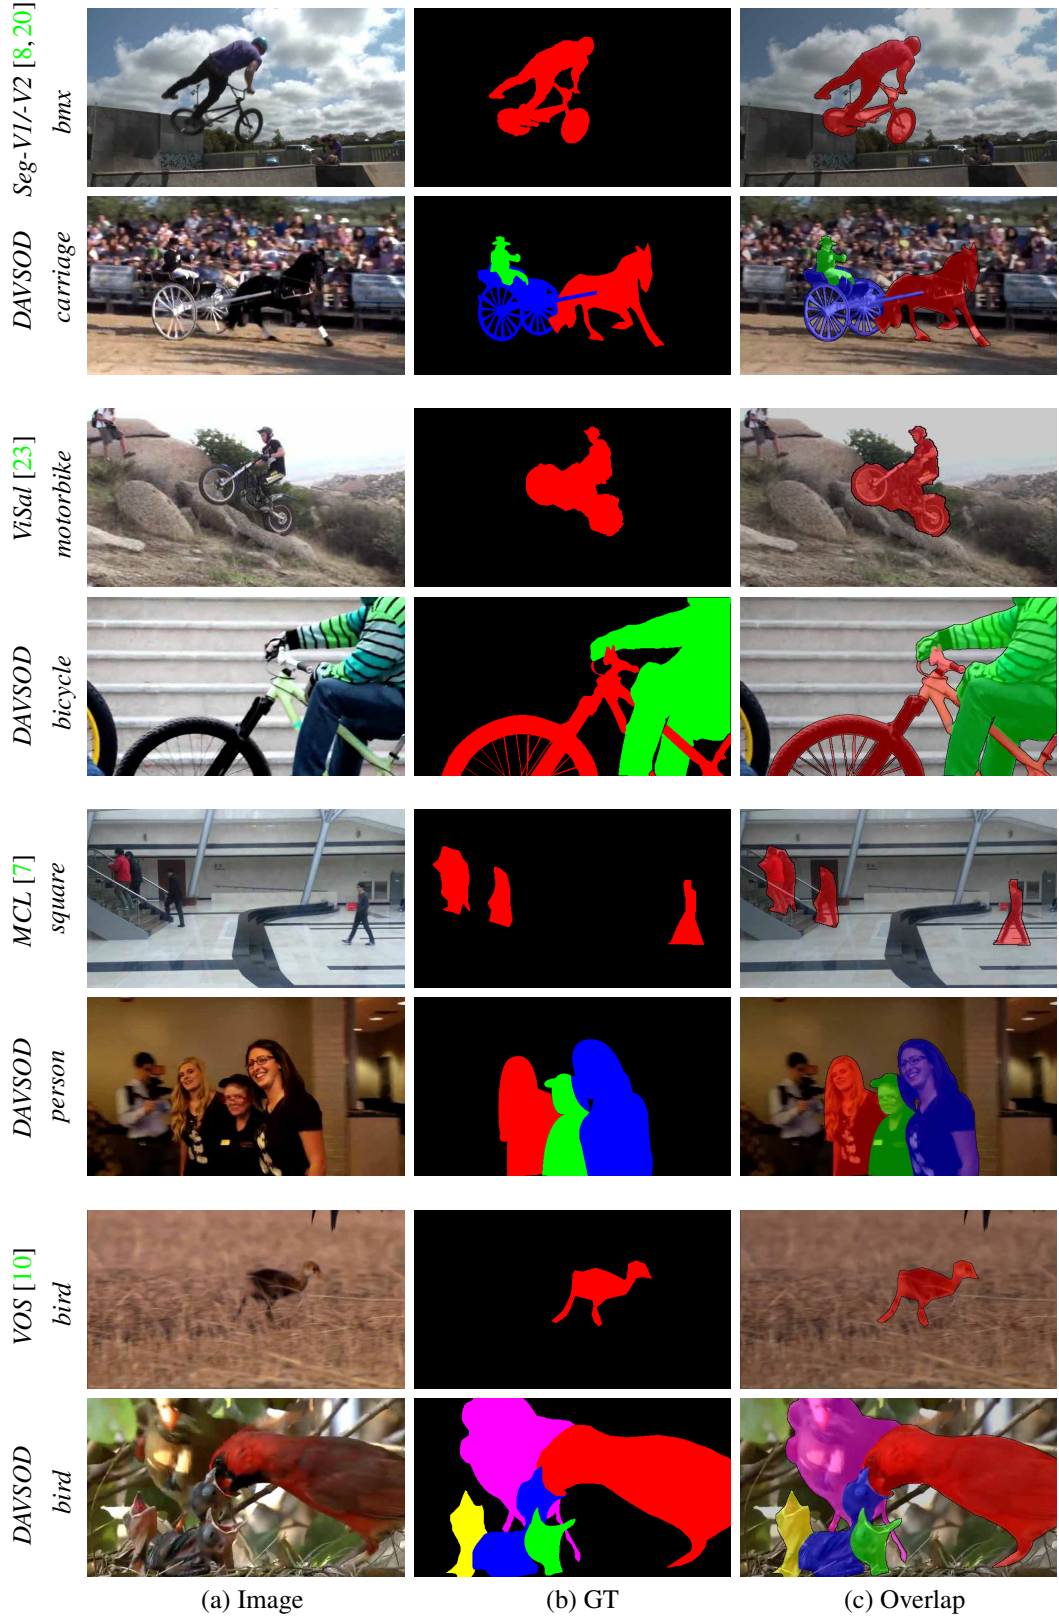

Figure 3: **Compared with previous object-level datasets** which are labeled with coarse boundary (the spoke in “bm” sequence, motorbike in 3<sup>rd</sup> row) or polygons (e.g., person in MCL, bird in VOS). However, the proposed object-/instance-level DAVSOD dataset is labeled with smooth fine boundaries (e.g., the wheel of carriage in 1<sup>st</sup> row, the spoke of bicycle in 4<sup>th</sup> row, bird in last row, etc.).

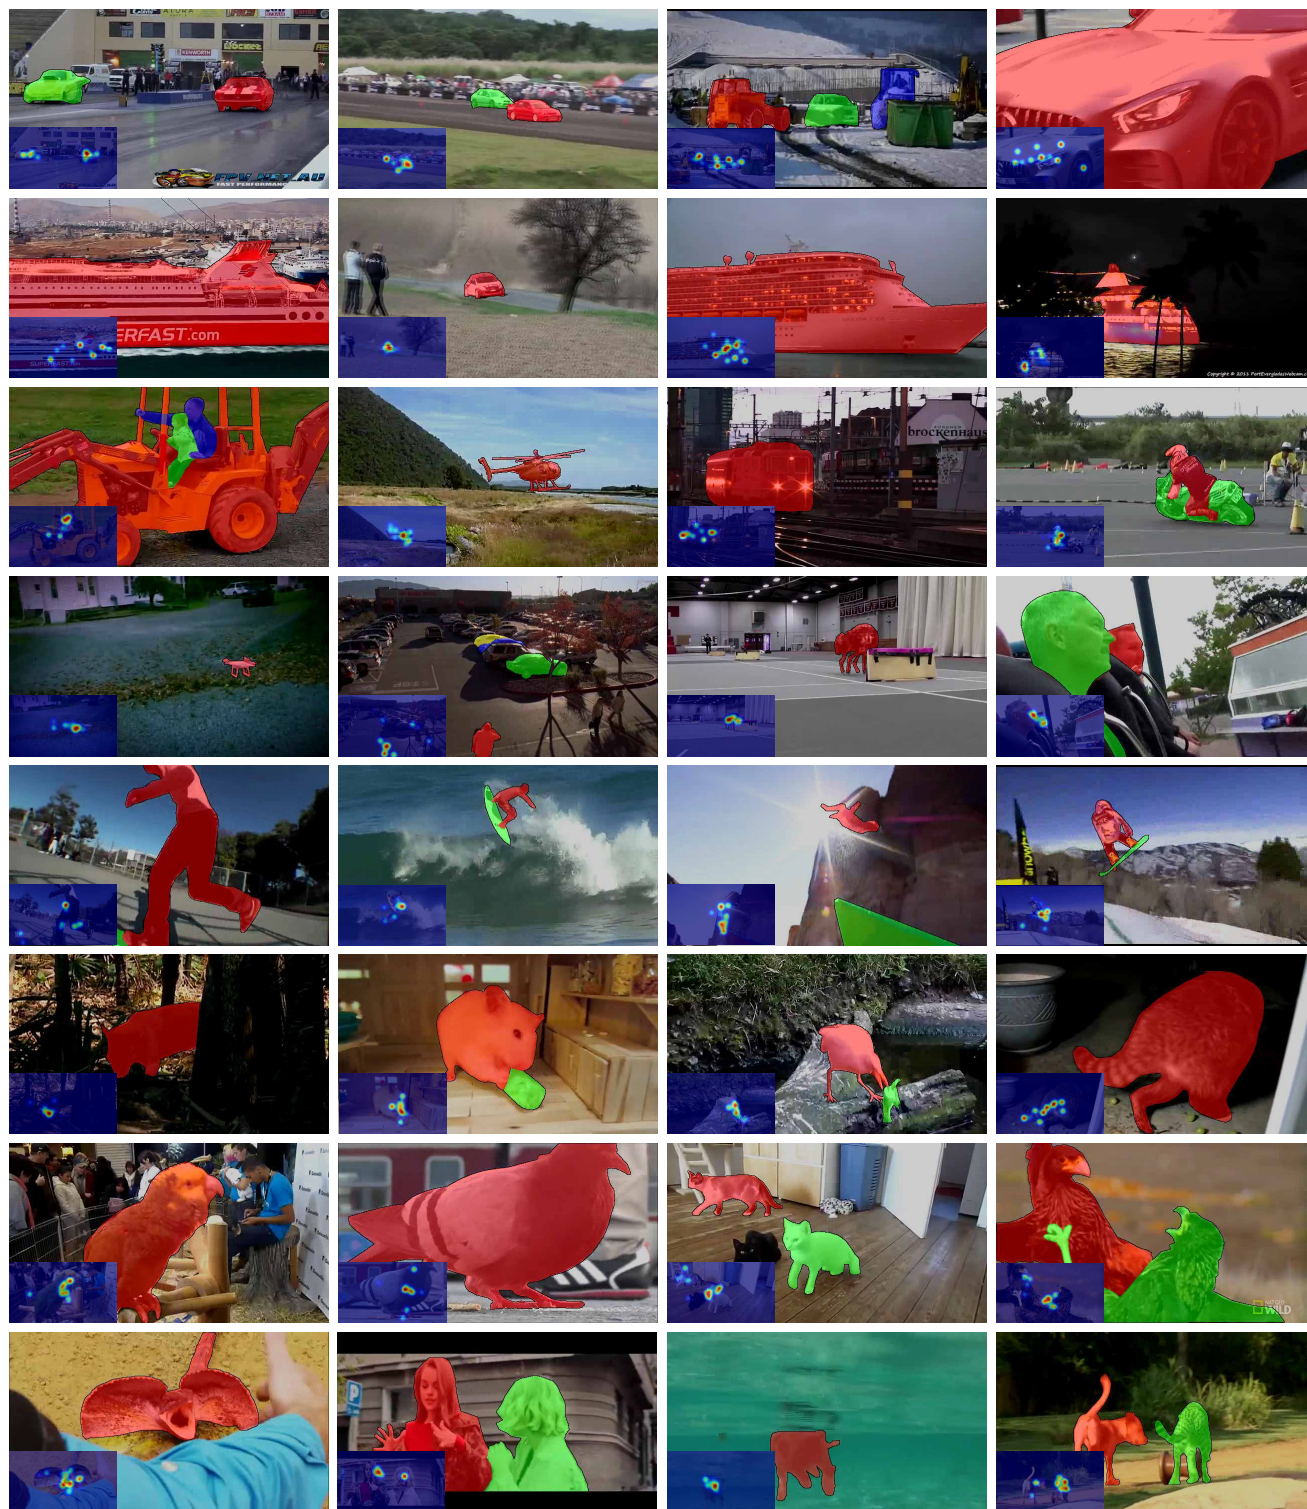

Figure 4: **Sample sequences from our dataset**, with instance-level ground truth segmentation masks and fixation map overlaid. Please refer to the accompanying video (VisualSaliency.mp4) for a visualization of the dataset.



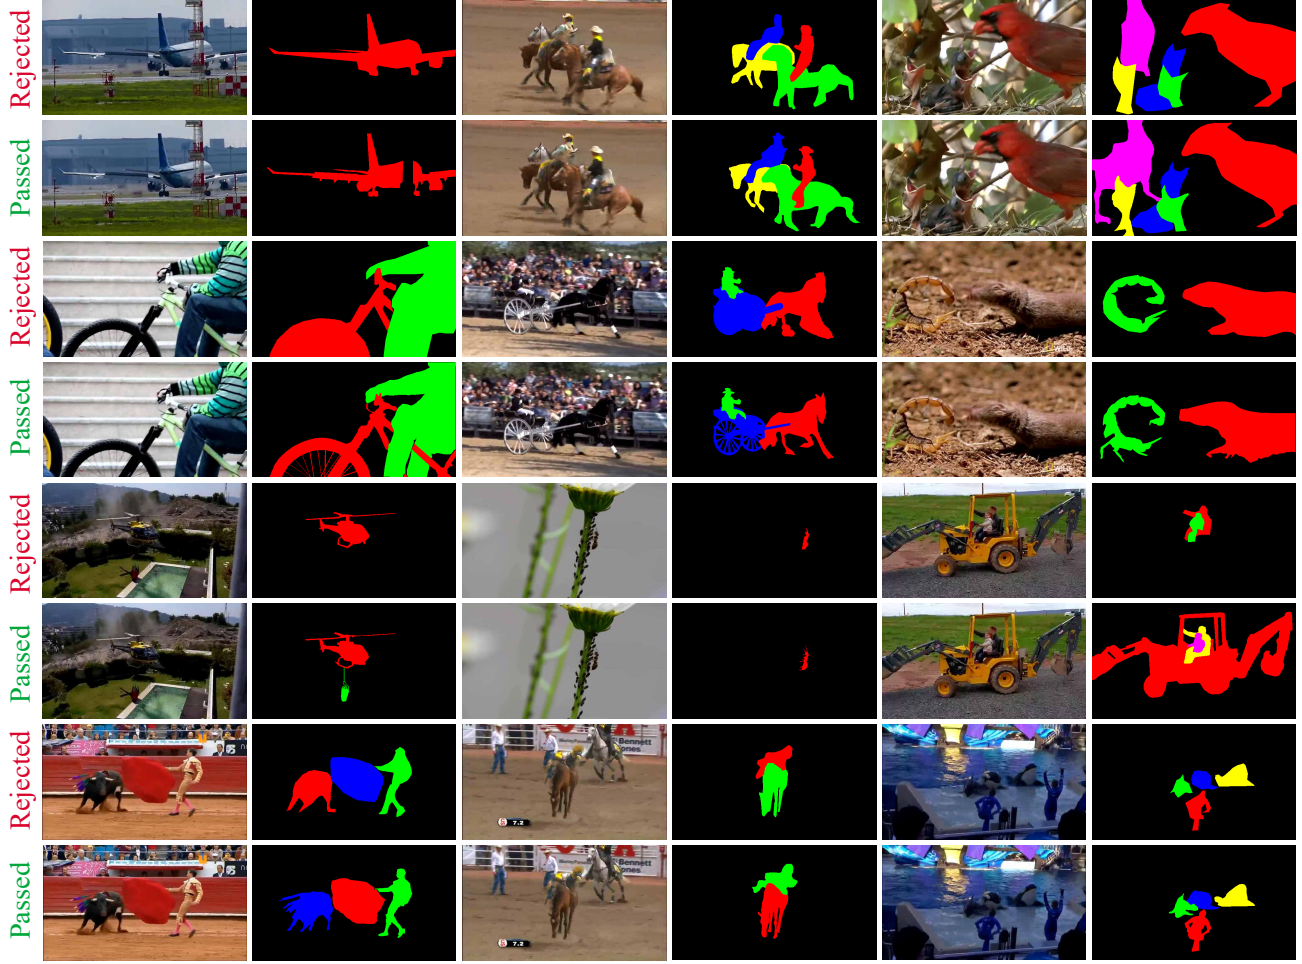

Figure 6: Examples of cases that passed or were rejected segmentation in the verification stage. Zoom-in for details.

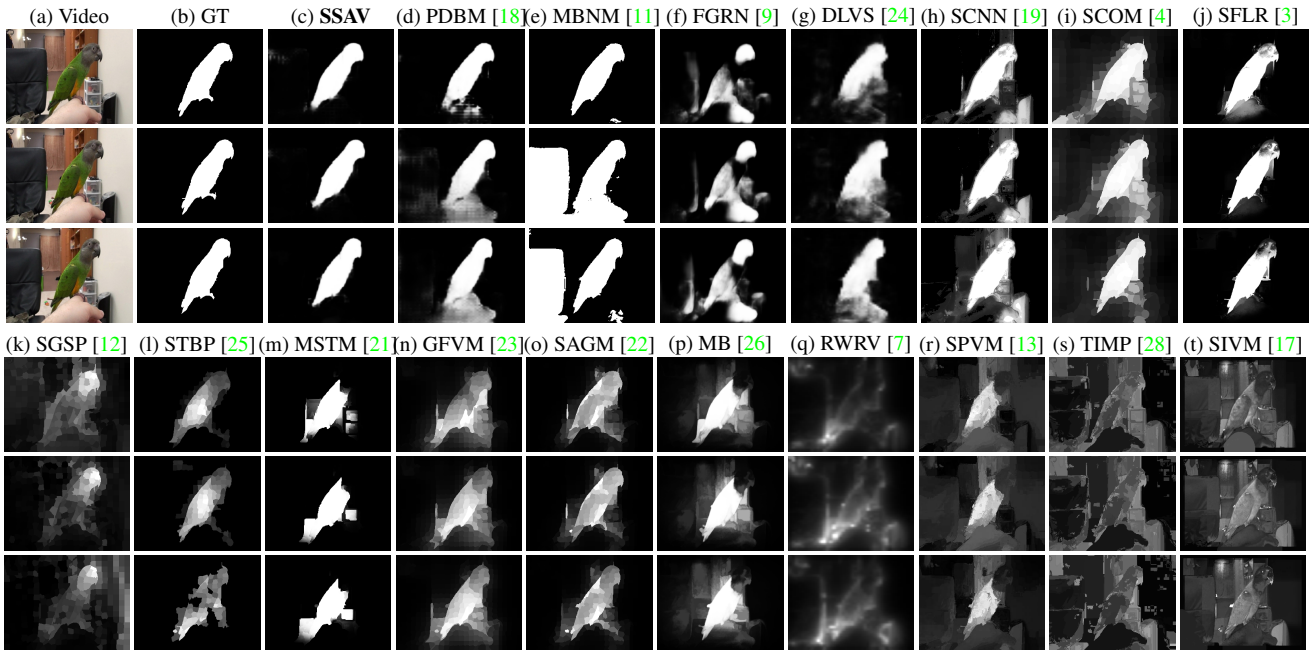

Figure 7: Qualitative comparison against other top-performing VSOD models. The *bird* sequence from the ViSal [23] dataset.

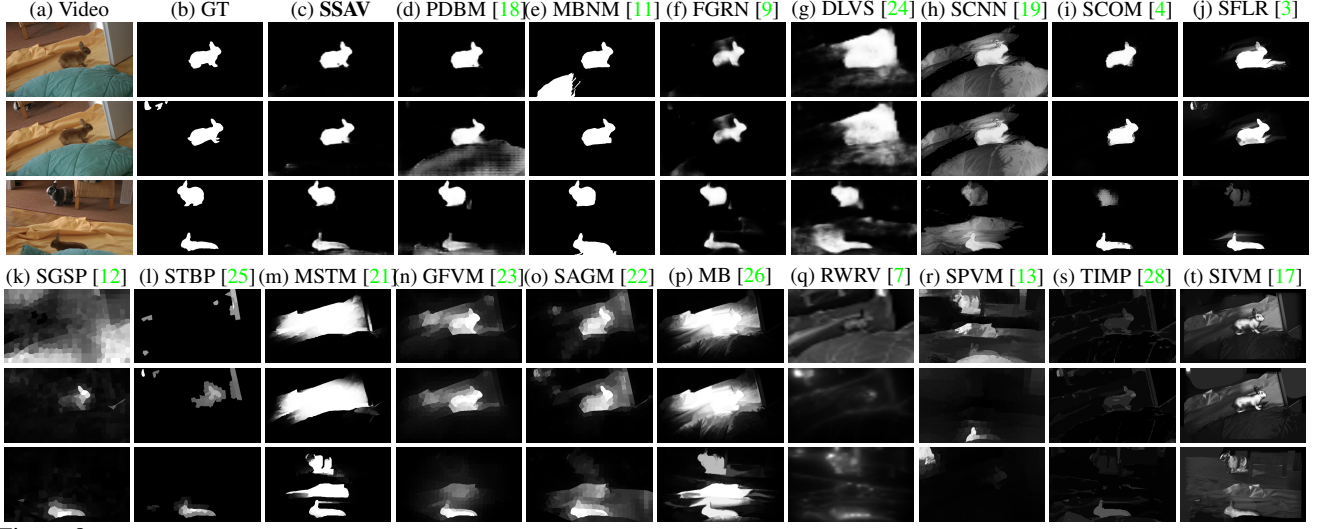

Figure 8: **Qualitative comparison against other top-performing VSOD models.** The *rabbits03* sequence from the FBMS [14] dataset. Zoom-in for details.

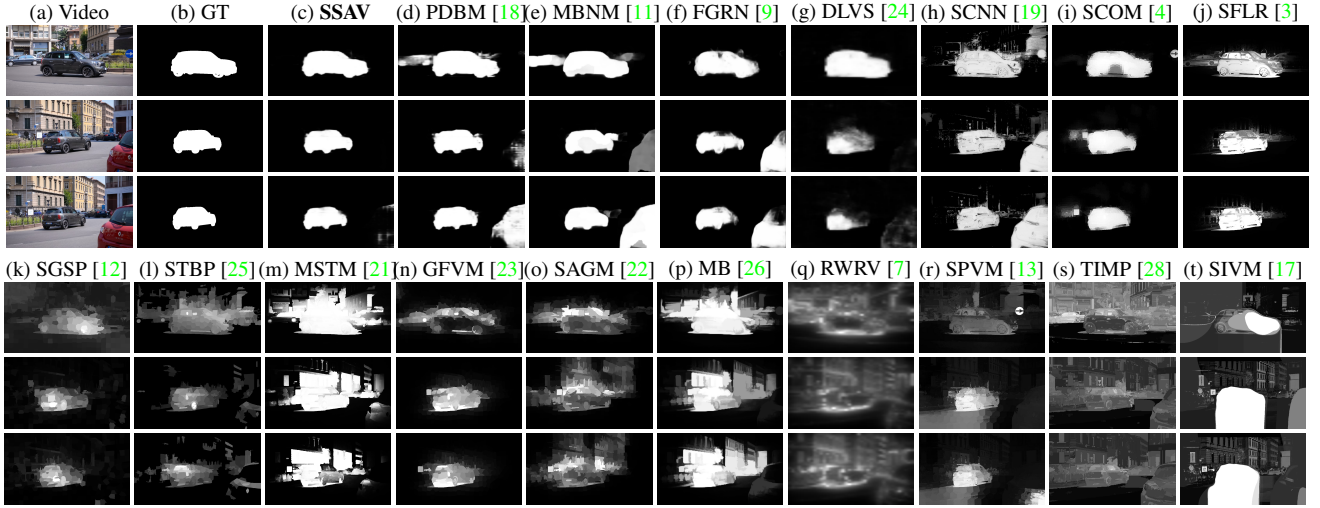

Figure 9: **Qualitative comparison against other top-performing VSOD models.** The *car-roundabout* sequence from the DAVIS [16] dataset. Zoom-in for details.

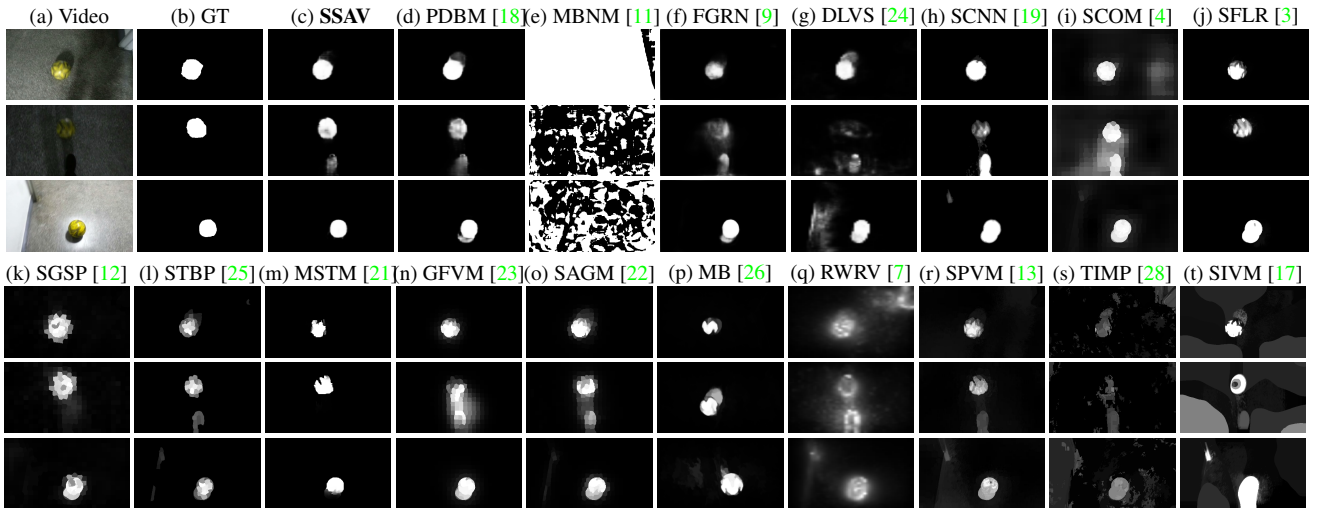

Figure 10: **Qualitative comparison against other top-performing VSOD models.** The *Ball* sequence from the MCL [7] dataset.

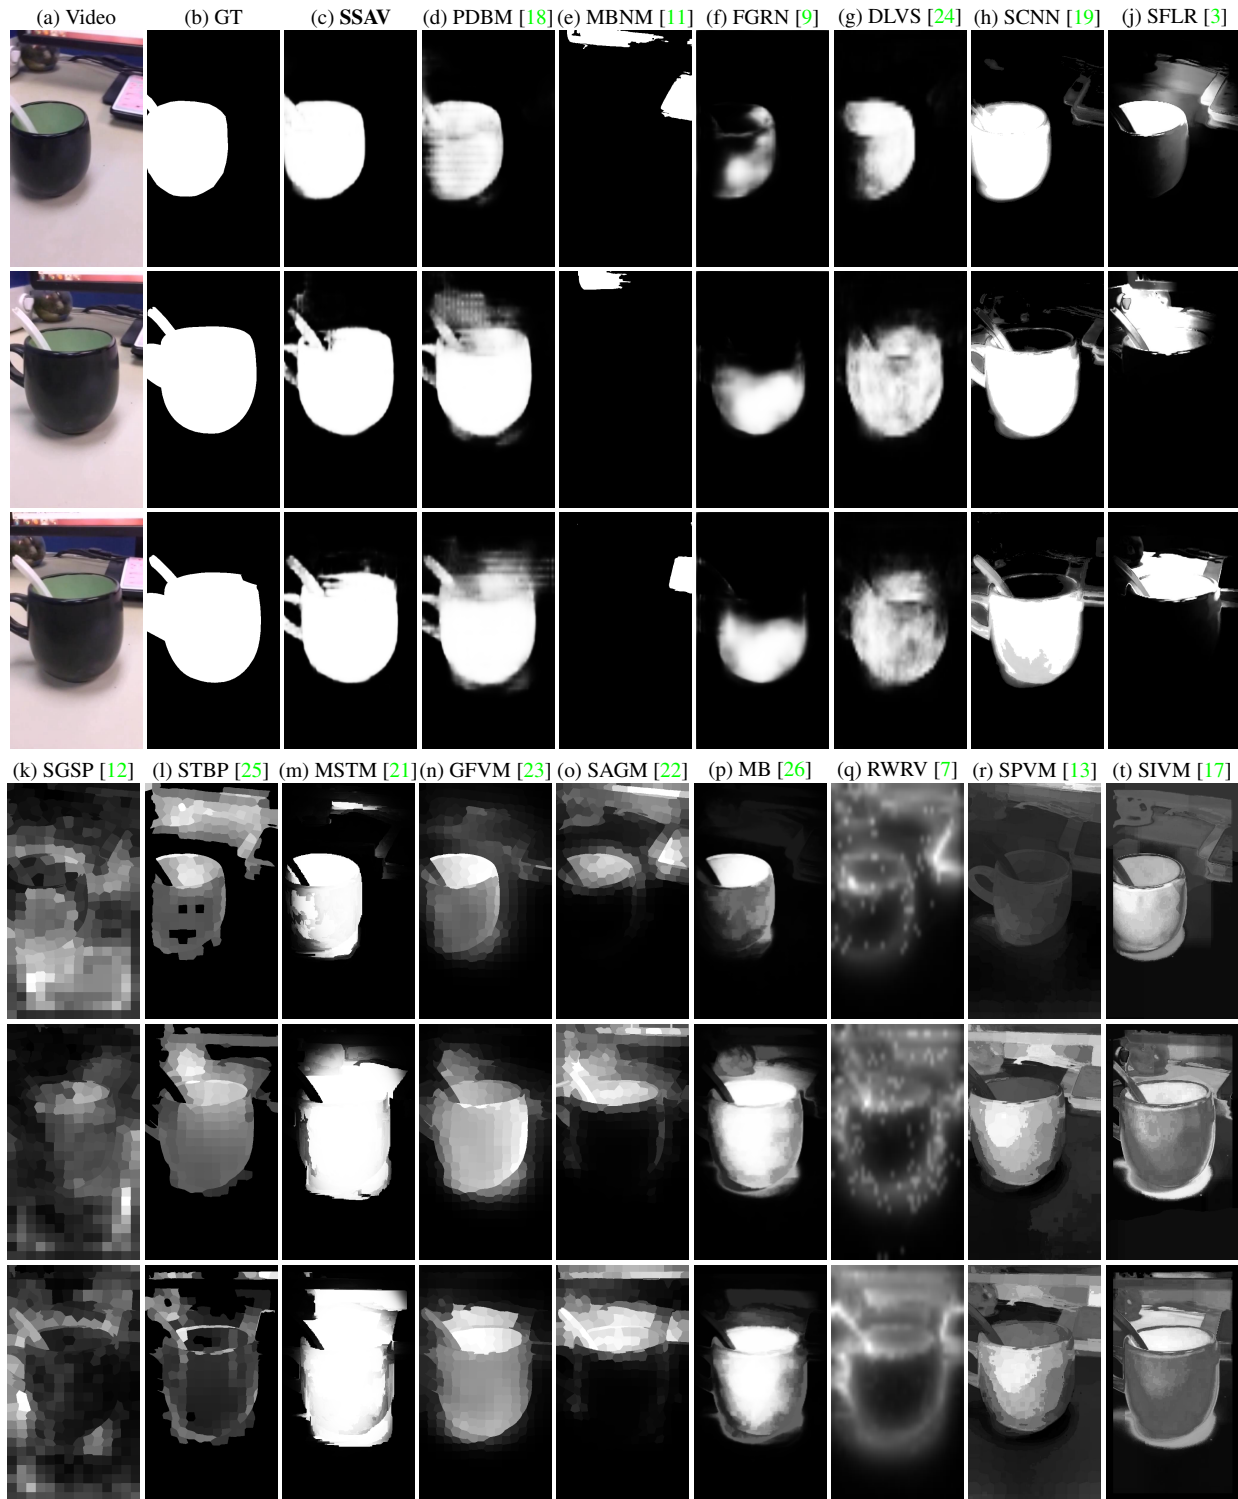

Figure 11: **Qualitative comparison against other top-performing VSOD models.** The *cup* sequence from the VOS [10] dataset. Zoom-in for details.

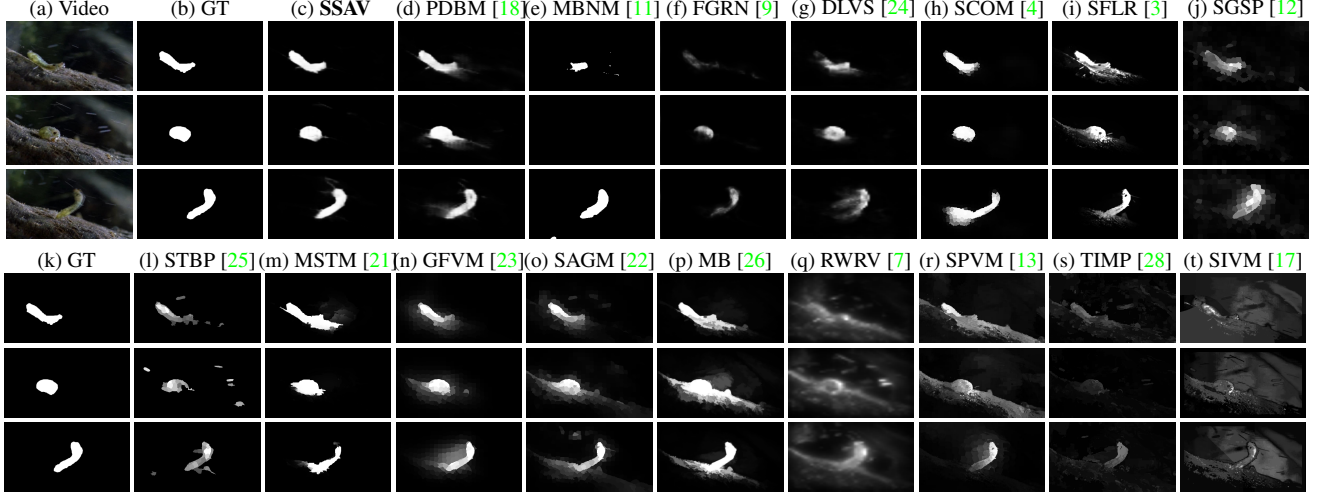

Figure 12: **Qualitative comparison against other top-performing VSOD models.** The *worm* sequence from the SegTrack-V2 [8] dataset. Zoom-in for details.

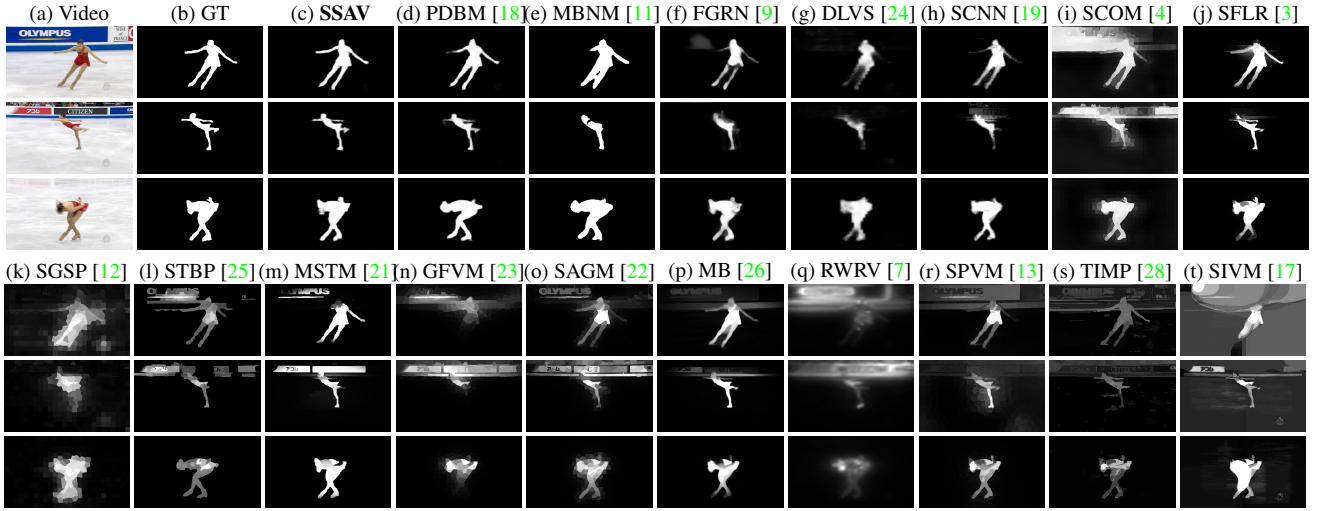

Figure 13: **Qualitative comparison against other top-performing VSOD models.** The *yunakim\_Long2* sequence from the UVSD [12] dataset. Zoom-in for details.

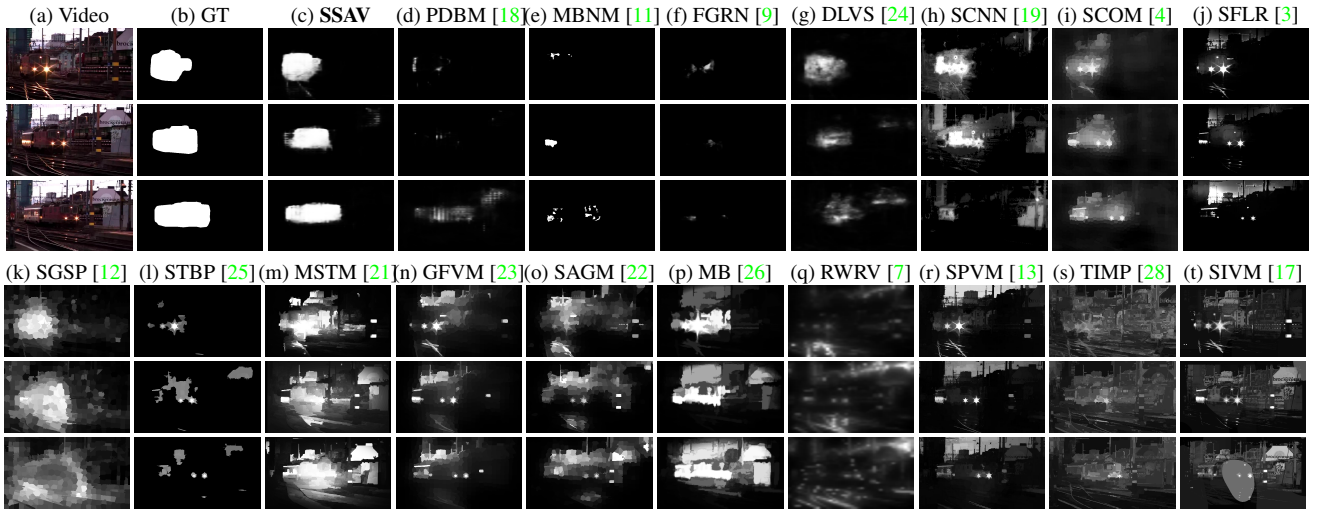

Figure 14: **Qualitative comparison against other top-performing VSOD models.** The *train* sequence from the proposed DAVSOD dataset. Zoom-in for details.
